# Supplementary material
Source: MDPI journal article supplement (https://www.mdpi.com/2071-1050/14/12/7086)
Supplement: s1 [file s1]

**Table S1***Summary of Practices (N=79) Identified in the Literature, Organized by Practice Type*

| <b>Citation</b>       | <b>Literature Type</b> | <b>Brief Description</b>                                                      | <b>Purpose Category</b> | <b>Scale of Practice Implementation</b> | <b>Main Target(s) of Change</b> | <b>Regional Classification(s)</b> | <b>Country(ies) where practice implemented</b> |
|-----------------------|------------------------|-------------------------------------------------------------------------------|-------------------------|-----------------------------------------|---------------------------------|-----------------------------------|------------------------------------------------|
| <i>Global Policy</i>  |                        |                                                                               |                         |                                         |                                 |                                   |                                                |
| Dominelli, 2011       | Journal article        | Describes and critiques the adoption and implementation of the Kyoto Protocol | Policy: Description     | More than one nation                    | National policy                 | Global                            | United Nations                                 |
| Dominelli, 2012a      | Chapter, book          | Describes Kyoto Protocol                                                      | Policy: Description     | More than one nation                    | National policy                 | Global                            | United Nations                                 |
| Erickson, 2018b       | Chapter, book          | Describes the Paris Agreement                                                 | Policy: Description     | More than one nation                    | National policy                 | Global                            | United Nations                                 |
| IFSW, 2019            | Website                | Describes principles of World Fair Trade Organization                         | Policy: Description     | More than one nation                    | National policy                 | Global                            | Global, not specified                          |
| Nesmith et al., 2020a | Chapter, book          | Describes the process and status of the Paris Agreement                       | Policy: Description     | More than one nation                    | National policy                 | Global                            | United Nations                                 |

| Citation               | Literature Type   | Brief Description                                                            | Purpose Category    | Scale of Practice Implementation | Main Target(s) of Change | Regional Classification(s)                      | Country(ies) where practice implemented |
|------------------------|-------------------|------------------------------------------------------------------------------|---------------------|----------------------------------|--------------------------|-------------------------------------------------|-----------------------------------------|
| Nesmith et al., 2020c  | Chapter, book     | Describes the adoption process and broad goals of the Kyoto Protocol         | Policy: Description | More than one nation             | National policy          | Global                                          | United Nations                          |
| Sumihira, 2019         | Chapter, workbook | Describes and critiques the Clean Development Mechanism                      | Policy: Description | More than one nation             | National policy          | Global                                          | United Nations                          |
| Tester, 2013           | Chapter, book     | Describes creation of the UNFCC and subsequent policy agreements and efforts | Policy: Description | More than one nation             | National policy          | Global                                          | United Nations                          |
| <i>National Policy</i> |                   |                                                                              |                     |                                  |                          |                                                 |                                         |
| Bhuyan et al., 2019    | Journal article   | Describes Green New Deal-related policies or efforts in three countries      | Policy: Description | Nation                           | National policy          | North America (Canada and U.S.); Western Europe | Canada; United Kingdom; United States   |
| Brueckner & Ross, 2019 | Chapter, book     | Describes national policy for carbon offset requirements                     | Policy: Description | Nation                           | Private industry         | East Asia and Pacific                           | Australia                               |

| Citation               | Literature Type | Brief Description                                                                                                      | Purpose Category                       | Scale of Practice Implementation | Main Target(s) of Change                                            | Regional Classification(s)                         | Country(ies) where practice implemented |
|------------------------|-----------------|------------------------------------------------------------------------------------------------------------------------|----------------------------------------|----------------------------------|---------------------------------------------------------------------|----------------------------------------------------|-----------------------------------------|
| Dominelli, 2012a       | Chapter, book   | Describes advocacy for Feed-in-Tariffs, to support renewable energy                                                    | Policy: Organizing or Advocacy         | Nation                           | Private industry                                                    | Western Europe                                     | United Kingdom                          |
| Erickson, 2018b        | Chapter, book   | Describes national climate action plan to reduce carbon emissions                                                      | Policy: Description                    | Nation                           | Multiple: Individuals or households, private industry, state policy | North America (Canada and U.S.)                    | United States                           |
| Hashem, n.d.           | Website         | Describes solar energy park example                                                                                    | Example of Action(s): Descriptive Only | Nation                           | Private industry                                                    | Middle East and North Africa                       | Egypt                                   |
| Landrigan et al., 2018 | Journal article | Describes examples of national clean energy targets, as part of scientific commission findings on pollution and health | Example of Action(s): Descriptive Only | Nation                           | National policy                                                     | East Asia and Pacific; Latin America and Caribbean | China; Ecuador                          |
| Louis et al., 2020     | Journal article | Analyzes national climate change policies with a gender lens                                                           | Policy: Research or Evaluation         | Nation                           | Could not be determined                                             | Eastern and Southern Africa                        | Namibia, South Africa, Zambia, Zimbabwe |

| Citation                        | Literature Type | Brief Description                                                                                  | Purpose Category                        | Scale of Practice Implementation                 | Main Target(s) of Change                                   | Regional Classification(s)      | Country(ies) where practice implemented |
|---------------------------------|-----------------|----------------------------------------------------------------------------------------------------|-----------------------------------------|--------------------------------------------------|------------------------------------------------------------|---------------------------------|-----------------------------------------|
| Nesmith et al., 2020c           | Chapter, book   | Describes national flagship laws for addressing climate change                                     | Policy: Description                     | Nation                                           | Private industry                                           | Not stated                      | Not stated                              |
| Palinkas, 2020                  | Chapter, book   | Describes national pledge for carbon neutrality                                                    | Policy: Description                     | Nation                                           | Could not be determined                                    | South Asia                      | Maldives                                |
| Rao & Teixeira, 2020            | Journal article | Calls on the profession to engage in environmental justice policy and a Green New Deal             | Policy: Description                     | Nation                                           | National policy                                            | North America (Canada and U.S.) | United States                           |
| Tonderayi, 2012                 | Journal article | Analyzes conceptualization and implementation of carbon tax legislation                            | Policy: Research or Evaluation          | Nation                                           | Individuals or households                                  | Eastern and Southern Africa     | Zimbabwe                                |
| <i>Local Policy or Planning</i> |                 |                                                                                                    |                                         |                                                  |                                                            |                                 |                                         |
| Bay, 2013                       | Journal article | Analyzes strategies, governance processes, and gender relations of group pursuing transition towns | Program Evaluation or Research: Process | City, county, or similar level unit of a country | Multiple: Individuals or households, local policy/planning | East Asia and Pacific           | Australia                               |

| Citation             | Literature Type | Brief Description                                                                                                        | Purpose Category                                     | Scale of Practice Implementation                               | Main Target(s) of Change                                   | Regional Classification(s)                                                                                                           | Country(ies) where practice implemented |
|----------------------|-----------------|--------------------------------------------------------------------------------------------------------------------------|------------------------------------------------------|----------------------------------------------------------------|------------------------------------------------------------|--------------------------------------------------------------------------------------------------------------------------------------|-----------------------------------------|
| Bay, 2016            | Journal article | Describes Transition Town movement from lens of complex systems theory and deep ecology theory                           | Other: Conceptual or Theoretical                     | City, county, or similar level unit of a country               | Multiple: Individuals or households, local policy/planning | East Asia and Pacific; Eastern Europe and Central Asia; Western Europe; Latin America and Caribbean; North America (Canada and U.S.) | Multiple, 23 specified                  |
| Dylan, 2013          | Chapter, book   | Describes sustainable design approach to planning                                                                        | Policy: Description                                  | Neighborhood, community, or village                            | Multiple: Local policy/planning , private industry         | North America (Canada and U.S.)                                                                                                      | Canada                                  |
| Poland et al., 2019  | Journal article | Analyzes how and where the Transition movement has grown, plus practices, challenges, opportunities, and lessons learned | Program Evaluation or Research: Process and Outcomes | More than one city, county, or similar level unit of a country | Multiple: Individuals or households, local policy/planning | North America (Canada and U.S.)                                                                                                      | Canada                                  |
| Smith & Miller, 2013 | Journal article | Analyzes ecocity mapping process and lessons learned                                                                     | Program Evaluation or Research: Process              | Neighborhood, community, or village                            | Local policy/planning                                      | North America (Canada and U.S.)                                                                                                      | United States                           |

| Citation                      | Literature Type   | Brief Description                                                   | Purpose Category               | Scale of Practice Implementation                 | Main Target(s) of Change | Regional Classification(s)      | Country(ies) where practice implemented      |
|-------------------------------|-------------------|---------------------------------------------------------------------|--------------------------------|--------------------------------------------------|--------------------------|---------------------------------|----------------------------------------------|
| <i>Organizing or Advocacy</i> |                   |                                                                     |                                |                                                  |                          |                                 |                                              |
| Brady et al., 2019            | Chapter, workbook | Describes Tribal organizing against fracking                        | Policy: Organizing or Advocacy | Tribal nation                                    | Private industry         | North America (Canada and U.S.) | Tribal nation: In Oklahoma, not specified    |
| Brueckner & Ross, 2019        | Chapter, book     | Describes anti-fracking organizing efforts                          | Policy: Organizing or Advocacy | Neighborhood, community, or village              | Private industry         | East Asia and Pacific           | Australia                                    |
| Brueckner & Ross, 2019        | Chapter, book     | Describes anti-liquid gas organizing efforts                        | Policy: Organizing or Advocacy | Neighborhood, community, or village              | Private industry         | East Asia and Pacific           | Australia                                    |
| Brueckner & Sinclair, 2019    | Chapter, book     | Describes activism against coal mine development on ancestral lands | Policy: Organizing or Advocacy | Could not be determined                          | Private industry         | East Asia and Pacific           | Australia                                    |
| Burgos Ortiz, 2018            | Chapter, book     | Describes protests to toxic coal ash disposal                       | Policy: Organizing or Advocacy | City, county, or similar level unit of a country | Private industry         | North America (Canada and U.S.) | United States (Puerto Rico)                  |
| Erickson, 2018a               | Chapter, book     | Describes Indigenous network's anti-pipeline organizing efforts     | Policy: Organizing or Advocacy | More than one tribal nation                      | Private industry         | North America (Canada and U.S.) | Tribal nations: Not specified; United States |

| Citation        | Literature Type | Brief Description                                                                                                                | Purpose Category                       | Scale of Practice Implementation                       | Main Target(s) of Change | Regional Classification(s)      | Country(ies) where practice implemented           |
|-----------------|-----------------|----------------------------------------------------------------------------------------------------------------------------------|----------------------------------------|--------------------------------------------------------|--------------------------|---------------------------------|---------------------------------------------------|
| Erickson, 2018c | Chapter, book   | Describes an environmental justice organizer's advocacy efforts                                                                  | Policy: Organizing or Advocacy         | More than one neighborhood, community, or village      | Private industry         | North America (Canada and U.S.) | Canada; United States                             |
| Ife, 2007       | Website         | Describes advocacy for national government to invest in renewable energy research and development                                | Policy: Organizing or Advocacy         | Individuals or households                              | National policy          | East Asia and Pacific           | Australia                                         |
| IFSW, 2016      | Website         | Provides National Association of Social Worker's statement of support for Indigenous' resistance efforts to pipeline development | Example of Action(s): Descriptive Only | Organization: Membership association                   | Private industry         | North America (Canada and U.S.) | Tribal nation: Standing Rock Sioux; United States |
| Lysack, 2015    | Journal article | Describes formation, strategies, challenges, and successes of coal phase-out network                                             | Policy: Organizing or Advocacy         | State, province, or other similar subunit of a country | State/provincial policy  | North America (Canada and U.S.) | Canada                                            |

| Citation                        | Literature Type   | Brief Description                                                                   | Purpose Category               | Scale of Practice Implementation | Main Target(s) of Change | Regional Classification(s)                             | Country(ies) where practice implemented                                   |
|---------------------------------|-------------------|-------------------------------------------------------------------------------------|--------------------------------|----------------------------------|--------------------------|--------------------------------------------------------|---------------------------------------------------------------------------|
| Martin & Quiroga-Menéndez, 2018 | Chapter, workbook | Describes history and status of Indigenous opposition to pipeline development       | Policy: Organizing or Advocacy | Tribal nation                    | Private industry         | North America (Canada and U.S.)                        | Tribal nation: Standing Rock Sioux; United States                         |
| Nesmith et al., 2020b           | Chapter, book     | Describes anti-coal organizing efforts                                              | Policy: Organizing or Advocacy | Tribal nation                    | Private industry         | North America (Canada and U.S.)                        | United States                                                             |
| Nesmith et al., 2020b           | Chapter, book     | Describes Tribal resistance to pipeline development                                 | Policy: Organizing or Advocacy | Tribal nation                    | Private industry         | North America (Canada and U.S.)                        | Tribal nation: United Houma                                               |
| Nesmith et al., 2020b           | Chapter, book     | Describes Tribal resistance to pipeline development                                 | Policy: Organizing or Advocacy | Tribal nation                    | Private industry         | North America (Canada and U.S.)                        | Tribal nation: Standing Rock Sioux reservation                            |
| Nesmith et al., 2020c           | Chapter, book     | Describes Standing Rock Sioux' response to pipeline development through their lands | Policy: Organizing or Advocacy | Tribal nation                    | Private industry         | North America (Canada and U.S.)                        | Tribal nation: Standing Rock Sioux reservation                            |
| Noble, 2018                     | Chapter, book     | Describes Indigenous, land-based activism against oil, gas, and mining              | Policy: Organizing or Advocacy | Tribal nation                    | Private industry         | East Asia and Pacific; North America (Canada and U.S.) | Australia; Tribal nations: Oglala Lakota Sioux, Caribou, Beaver Lake Cree |



| Citation              | Literature Type | Brief Description                                                          | Purpose Category                               | Scale of Practice Implementation                       | Main Target(s) of Change  | Regional Classification(s)      | Country(ies) where practice implemented |
|-----------------------|-----------------|----------------------------------------------------------------------------|------------------------------------------------|--------------------------------------------------------|---------------------------|---------------------------------|-----------------------------------------|
| Powell et al., 2019   | Journal article | Describes campaign to achieve a statewide fracking ban                     | Policy: Organizing or Advocacy                 | State, province, or other similar subunit of a country | State/provincial policy   | North America (Canada and U.S.) | United States                           |
| Weber, 2012           | Journal article | Describes efforts to create a local-level Energy Alliance                  | Policy: Organizing or Advocacy                 | City, county, or similar level unit of a country       | Individuals or households | North America (Canada and U.S.) | United States                           |
| Zitzmann, 2018        | Dissertation    | Explores experiences of "ecological conversion" among U.S. Catholics       | Descriptive Research: Experiences              | Individuals or households                              | State/provincial policy   | North America (Canada and U.S.) | United States                           |
| <i>Energy at Home</i> |                 |                                                                            |                                                |                                                        |                           |                                 |                                         |
| Alber, 2013           | Chapter, book   | Explores gendered aspects of decision-making for switching to green energy | Descriptive Research: Experiences, Perceptions | Individuals or households                              | Individuals or households | Western Europe                  | Germany                                 |
| Anderman et al., 2015 | Journal article | Analyzes effects of biogas cookstoves on household diet and women's time.  | Program Evaluation or Research: Outcomes       | More than one neighborhood, community, or village      | Individuals or households | South Asia                      | India                                   |

| Citation             | Literature Type   | Brief Description                                                                                 | Purpose Category                         | Scale of Practice Implementation                  | Main Target(s) of Change                                                        | Regional Classification(s)      | Country(ies) where practice implemented |
|----------------------|-------------------|---------------------------------------------------------------------------------------------------|------------------------------------------|---------------------------------------------------|---------------------------------------------------------------------------------|---------------------------------|-----------------------------------------|
| Anugwom et al., 2020 | Journal article   | Analyzes factors influencing household adoption of solar home systems                             | Program Evaluation or Research: Outcomes | More than one neighborhood, community, or village | Individuals or households                                                       | West and Central Africa         | Nigeria                                 |
| Borst et al., 2017   | Chapter, workbook | Describes weatherization and green economy program, plus experiences of youth participants        | Example of Action(s): Descriptive Only   | Neighborhood, community, or village               | Individuals or households                                                       | North America (Canada and U.S.) | United States                           |
| Dhal et al., 2020    | Journal article   | Analyzes women's motivation, satisfaction, and impacts related to adoption of improved cookstoves | Program Evaluation or Research: Outcomes | Neighborhood, community, or village               | Individuals or households                                                       | South Asia                      | India                                   |
| Dominelli, 2011      | Journal article   | Describes community effort to address energy poverty and renewable energy access                  | Example of Action(s): Descriptive Only   | Neighborhood, community, or village               | Multiple: Individuals or households, local policy or planning, private industry | Western Europe                  | England                                 |

| <b>Citation</b>  | <b>Literature Type</b> | <b>Brief Description</b>                                                                                                   | <b>Purpose Category</b>                | <b>Scale of Practice Implementation</b>           | <b>Main Target(s) of Change</b> | <b>Regional Classification(s)</b> | <b>Country(ies) where practice implemented</b> |
|------------------|------------------------|----------------------------------------------------------------------------------------------------------------------------|----------------------------------------|---------------------------------------------------|---------------------------------|-----------------------------------|------------------------------------------------|
| Dominelli, 2012a | Chapter, book          | Describes effort to install solar stoves in homes for cooking and heating, to reduce firewood use                          | Example of Action(s): Descriptive Only | Neighborhood, community, or village               | Individuals or households       | Latin America and Caribbean       | Argentina                                      |
| Dominelli, 2012c | Chapter, book          | Describes self-employed women's associations, which include energy-related projects that reduce emissions                  | Example of Action(s): Descriptive Only | Could not be determined                           | Individuals or households       | South Asia                        | Afghanistan; India; Sri Lanka                  |
| Ferrari, 2013    | Dissertation           | Explores residents' perceptions of fracking                                                                                | Descriptive Research: Perceptions      | Individuals or households                         | Individuals or households       | North America (Canada and U.S.)   | United States                                  |
| IFSW, 2020       | Website                | Describes distribution of solar lamps at quarantine center                                                                 | Example of Action(s): Descriptive Only | Organization: Quarantine centers                  | Individuals or households       | Middle East and North Africa      | Yemen                                          |
| IFSW, n.d.b      | Website                | Describes community project that teaches women to build solar ovens and bicycle blenders, for home and entrepreneurial use | Example of Action(s): Descriptive Only | More than one neighborhood, community, or village | Individuals or households       | Latin America and Caribbean       | Bolivia                                        |

| <b>Citation</b>     | <b>Literature Type</b> | <b>Brief Description</b>                                                                                       | <b>Purpose Category</b>                              | <b>Scale of Practice Implementation</b>                        | <b>Main Target(s) of Change</b> | <b>Regional Classification(s)</b> | <b>Country(ies) where practice implemented</b> |
|---------------------|------------------------|----------------------------------------------------------------------------------------------------------------|------------------------------------------------------|----------------------------------------------------------------|---------------------------------|-----------------------------------|------------------------------------------------|
| Joshi et al., 2019a | Journal article        | Analyzes localization strategy for solar energy management in communities                                      | Program Evaluation or Research: Process              | More than one city, county, or similar level unit of a country | Individuals or households       | South Asia                        | India                                          |
| Joshi et al., 2019b | Journal article        | Analyzes process and impacts of solar energy project for energy security and livelihoods                       | Program Evaluation or Research: Process and Outcomes | City, county, or similar level unit of a country               | Individuals or households       | South Asia                        | India                                          |
| Keevers, 2020       | Journal article        | Analyzes model and impacts of community-based solar energy project                                             | Program Evaluation or Research: Process and Outcomes | More than one neighborhood, community, or village              | Individuals or households       | East Asia and Pacific             | Timor-Leste                                    |
| Kumar, 2017         | Disser-tation          | Analyzes adoption and sustained use of liquified petroleum gas cookstoves, including role of personal networks | Program Evaluation or Research: Outcomes             | More than one neighborhood, community, or village              | Individuals or households       | South Asia                        | India                                          |
| Martin, 2019        | Chapter, workbook      | Describes nongovernmental organization's partnership with community on renewable energy                        | Example of Action(s): Descriptive Only               | More than one neighborhood, community, or village              | Individuals or households       | Latin America and Caribbean       | Bolivia                                        |

| Citation                   | Literature Type | Brief Description                                                                                                                                                      | Purpose Category                         | Scale of Practice Implementation                               | Main Target(s) of Change                                   | Regional Classification(s)      | Country(ies) where practice implemented |
|----------------------------|-----------------|------------------------------------------------------------------------------------------------------------------------------------------------------------------------|------------------------------------------|----------------------------------------------------------------|------------------------------------------------------------|---------------------------------|-----------------------------------------|
| Sharma et al., 2019        | Journal article | Analyzes effects of solar study lamps on children's education and household energy expenses and consumption                                                            | Program Evaluation or Research: Outcomes | More than one city, county, or similar level unit of a country | Individuals or households                                  | South Asia                      | India                                   |
| Vandena-beele et al., 2016 | Chapter, book   | Describes multi-prong effort in public housing communities to reduce energy usage, educate residents, and advocate for agency to invest in infrastructure improvements | Example of Action(s): Descriptive Only   | More than one neighborhood, community, or village              | Multiple: Individuals or households, local policy/planning | Western Europe                  | Belgium                                 |
| Venkateswaran et al., 2018 | Journal article | Analyzes solar lamp assembly, distribution, and technology implementation process                                                                                      | Program Evaluation or Research: Process  | More than one city, county, or similar level unit of a country | Individuals or households                                  | South Asia                      | India                                   |
| Zitzmann, 2018             | Dissertation    | Explores experiences of "ecological conversion" among U.S. Catholics                                                                                                   | Descriptive Research: Experiences        | Individuals or households                                      | Individuals or households                                  | North America (Canada and U.S.) | United States                           |

| Citation                | Literature Type | Brief Description                                                                                                          | Purpose Category                                     | Scale of Practice Implementation                  | Main Target(s) of Change  | Regional Classification(s)      | Country(ies) where practice implemented |
|-------------------------|-----------------|----------------------------------------------------------------------------------------------------------------------------|------------------------------------------------------|---------------------------------------------------|---------------------------|---------------------------------|-----------------------------------------|
| <i>Entrepreneurship</i> |                 |                                                                                                                            |                                                      |                                                   |                           |                                 |                                         |
| Erickson, 2018b         | Chapter, book   | Describes creation and goals of a green economy, including for employment purposes                                         | Example of Action(s): Descriptive Only               | Could not be determined                           | Private industry          | North America (Canada and U.S.) | United States                           |
| IFSW, n.d.b             | Website         | Describes community project that teaches women to build solar ovens and bicycle blenders, for home and entrepreneurial use | Example of Action(s): Descriptive Only               | More than one neighborhood, community, or village | Individuals or households | Latin America and Caribbean     | Bolivia                                 |
| Joshi et al., 2019b     | Journal article | Analyzes process and impacts of solar energy project for energy security and livelihoods                                   | Program Evaluation or Research: Process and Outcomes | City, county, or similar level unit of a country  | Individuals or households | South Asia                      | India                                   |
| Keevers, 2020           | Journal article | Analyzes model and impacts of community-based solar energy project                                                         | Program Evaluation or Research: Process and Outcomes | More than one neighborhood, community, or village | Individuals or households | East Asia and Pacific           | Timor-Leste                             |

| Citation            | Literature Type | Brief Description                                                                                       | Purpose Category                         | Scale of Practice Implementation    | Main Target(s) of Change  | Regional Classification(s)  | Country(ies) where practice implemented |
|---------------------|-----------------|---------------------------------------------------------------------------------------------------------|------------------------------------------|-------------------------------------|---------------------------|-----------------------------|-----------------------------------------|
| <i>Education</i>    |                 |                                                                                                         |                                          |                                     |                           |                             |                                         |
| Alber, 2013         | Chapter, book   | Analyzes impacts of a training about switching to green energy on women's energy decisions for the home | Program Evaluation or Research: Outcomes | Individuals or households           | Individuals or households | Western Europe              | Germany                                 |
| Boetto & Bell, 2015 | Journal article | Analyzes impact on students of course on gender, carbon emissions, and global impacts                   | Program Evaluation or Research: Outcomes | Organization: Classroom             | Individuals or households | East Asia and Pacific       | Australia                               |
| Erickson, 2018c     | Chapter, book   | Describes a climate education initiative                                                                | Example of Action(s): Descriptive Only   | Individuals or households           | Individuals or households | Global                      | Multiple, not specified                 |
| <i>Other</i>        |                 |                                                                                                         |                                          |                                     |                           |                             |                                         |
| Dominelli, 2011     | Journal article | Describes community effort to secure renewable energy sources for cooking, heating, and irrigation      | Example of Action(s): Descriptive Only   | Neighborhood, community, or village | Individuals or households | Latin America and Caribbean | Argentina                               |

| Citation              | Literature Type | Brief Description                                                                                             | Purpose Category                       | Scale of Practice Implementation                       | Main Target(s) of Change                              | Regional Classification(s)      | Country(ies) where practice implemented                 |
|-----------------------|-----------------|---------------------------------------------------------------------------------------------------------------|----------------------------------------|--------------------------------------------------------|-------------------------------------------------------|---------------------------------|---------------------------------------------------------|
| Dominelli, 2012a      | Chapter, book   | Describes community coalition to address fuel poverty, access to renewable energy, and sustainable employment | Example of Action(s): Descriptive Only | Neighborhood, community, or village                    | Multiple: Individuals or households, private industry | Western Europe                  | United Kingdom                                          |
| Dominelli, 2012b      | Chapter, book   | Describes use of environmental assessment toolkit to reject gas-fired electricity plant                       | Example of Action(s): Descriptive Only | Tribal nation                                          | Private industry                                      | North America (Canada and U.S.) | Canada; Tribal nation: Snuneymuxw First Nations peoples |
| IFSW, n.d.a           | Website         | Describes travel-related carbon emissions offset program                                                      | Example of Action(s): Descriptive Only | Organization: Membership association                   | Individuals or households                             | Global                          | Multiple, not specified                                 |
| IFSW, n.d.a           | Website         | Describes ways to lower personal ecological footprint                                                         | Example of Action(s): Descriptive Only | Organization: Membership association                   | Individuals or households                             | Global                          | Multiple, not specified                                 |
| Nesmith et al., 2020c | Chapter, book   | Describes state policies to regulate greenhouse gas emissions and set reduction targets                       | Policy: Description                    | State, province, or other similar subunit of a country | Private industry                                      | North America (Canada and U.S.) | United States                                           |



| <b>Citation</b>     | <b>Literature Type</b> | <b>Brief Description</b>                                                                        | <b>Purpose Category</b>                | <b>Scale of Practice Implementation</b>           | <b>Main Target(s) of Change</b>                    | <b>Regional Classification(s)</b> | <b>Country(ies) where practice implemented</b> |
|---------------------|------------------------|-------------------------------------------------------------------------------------------------|----------------------------------------|---------------------------------------------------|----------------------------------------------------|-----------------------------------|------------------------------------------------|
| Polack et al., 2008 | Journal article        | Describes recommendations and strategies for community organizers to support local food systems | Example of Action(s): Descriptive Only | More than one neighborhood, community, or village | Multiple: Local policy/planning , private industry | North America (Canada and U.S.)   | United States                                  |
| Trainer, 2014       | Journal article        | Analyzes potential for solar energy capacity, globally                                          | Other: Technical Assessment            | More than one nation                              | Could not be determined                            | Global                            | Multiple, not specified                        |
| Zitzmann, 2018      | Dissertation           | Explores experiences of "ecological conversion" among U.S. Catholics                            | Descriptive Research: Experiences      | Individuals or households                         | Individuals or households                          | North America (Canada and U.S.)   | United States                                  |
